# Supplementary material
Source: Springer Nature journal article supplement (https://www.springermedizin.de/resource/supplementary/12891_2009_736_MOESM1_ESM.pdf/9506290)
Supplement: MOESM1 [file 9506290]

**53 patients  
(56 ACD procedures)**

```
graph TD; A["53 patients  
(56 ACD procedures)"] --> B["5 excluded  
- 1 RIP at follow-up  
- 3 patients with two ACD procedures  
- 1 refusal to participate"]; A --> C["18 ACD with No Bone graft  
- 14 disc replacements  
- 4 structural allografts with bone substitute"]; A --> D["29 ACDF with Bone graft"]
```

**5 excluded**

- 1 RIP at follow-up
- 3 patients with two ACD procedures
- 1 refusal to participate

**18 ACD with No Bone graft**

- 14 disc replacements
- 4 structural allografts with bone substitute

**29 ACDF with Bone graft**
